# Supplementary material for: How to properly evaluate and compare the thermochromic performance of VO2-based smart coatings
Source: Royal Society of Chemistry journal article supplement (doi:10.1039/c9ta06681k), 2019-01-01
Supplement: c9ta06681k1.pdf [file c9ta06681k1.pdf]

**Table S1.** Optical properties of recently reported VO<sub>2</sub>-based thermochromic films.

| Sample                                                                                 | $T_{lum,lt}(\%)$ | $T_{lum,ht}(\%)$ | $T_{sol,lt}(\%)$ | $T_{sol,ht}(\%)$ | $\Delta T_{sol}(\%)$ | Reference |
|----------------------------------------------------------------------------------------|------------------|------------------|------------------|------------------|----------------------|-----------|
| <b>Single-thermally driven VO<sub>2</sub>-based smart coatings</b>                     |                  |                  |                  |                  |                      |           |
| VO <sub>2</sub> :Si(17%)                                                               | 36.1             | 33.3             | 39.7             | 30.5             | 9.2                  | 1         |
| Mg-doped VO <sub>2</sub> nanoparticle                                                  | 54.2             | 51.8             | 58.0             | 47.4             | 10.6                 | 2         |
| F-doped VO <sub>2</sub> nanoparticles                                                  | 48.7             | 45.9             | 45.9             | 35.1             | 10.7                 | 3         |
| SiO <sub>2</sub> /VO <sub>2</sub>                                                      | 27.6             | 26.3             | 25.1             | 18.8             | 6.3                  | 4         |
| TiO <sub>2</sub> /VO <sub>2</sub> /TiO <sub>2</sub>                                    | 42.5             | 39.8             | -                | -                | 6.9                  | 5         |
| TiO <sub>2</sub> /VO <sub>2</sub>                                                      | 32.4             | 31.3             | 37.2             | 28.6             | 8.6                  | 6         |
| TiO <sub>2</sub> /VO <sub>2</sub> /TiO <sub>2</sub>                                    | 30.1             | 27.8             | 33.8             | 23.6             | 10.2                 | 6         |
| Double-sided VO <sub>2</sub> film                                                      | 39.8             | 41.8             | 50.2             | 40.0             | 10.2                 | 7         |
| VO <sub>2</sub> /SiO <sub>2</sub> /TiO <sub>2</sub>                                    | 17.8             | 18.2             | 28.8             | 13.5             | 15.3                 | 8         |
| TiO <sub>2</sub> /VO <sub>2</sub> /TiO <sub>2</sub> /VO <sub>2</sub> /TiO <sub>2</sub> | 45.0             | 42.3             | 52.1             | 40.0             | 12.1                 | 9         |
| Spinodal TiO <sub>2</sub> -VO <sub>2</sub> Film                                        | 22.0             | 20.9             | 33.2             | 20.1             | 13.1                 | 10        |
| Cr <sub>2</sub> O <sub>3</sub> /VO <sub>2</sub>                                        | 46.0             | 36.9             | 41.6             | 29.4             | 12.2                 | 11        |
| Cr <sub>2</sub> O <sub>3</sub> /VO <sub>2</sub> /SiO <sub>2</sub>                      | 54.0             | 42.2             | 52.4             | 36.3             | 16.1                 | 12        |
| SiNx/NiCrOx/SiNx/VOx/SiNx/NiCr<br>Ox/SiNx                                              | 32.7%            | -                | -                | -                | 18.02                | 13        |
| Nanoporous VO <sub>2</sub> Films                                                       | 43.3             | 39.9             | 42.9             | 28.8             | 14.1                 | 14        |
| VO <sub>2</sub> @SiO <sub>2</sub> nanoparticles                                        | 36.0             | 40.3             | 50.3             | 41.9             | 8.4                  | 15        |
| SiO <sub>2</sub> /VO <sub>2</sub> core/shell structure                                 | 55.3             | 54.2             | 58.7             | 51.2             | 7.5                  | 16        |
| VO <sub>2</sub> @SiO <sub>2</sub> nanorods                                             | 37.07            | 34.31            | 50.36            | 31.82            | 18.54                | 17        |
| VO <sub>2</sub> /BaSO <sub>4</sub> composites                                          | 42.2             | 43.5             | 51.2             | 38.9             | 12.4                 | 18        |
| VO <sub>2</sub> /CoFe <sub>2</sub> O <sub>4</sub> composites                           | 21.53            | 21.40            | 35.27            | 18.66            | 16.6                 | 19        |
| VO <sub>2</sub> /Si-Al gel composite                                                   | 63.7             | 54.4             | 61.9             | 49.9             | 12.0                 | 20        |
| <b>Double-thermally driven VO<sub>2</sub>-based smart coatings</b>                     |                  |                  |                  |                  |                      |           |
| VO <sub>2</sub> -PNIPAm                                                                | 82.1             | 43.2             | 38.9             | 62.6             | 34.7                 | 21        |
| VO <sub>2</sub> -Ni-Cl-ionic liquid                                                    | 52.08            | 29.26            | 58.11            | 27.35            | 30.76                | 22        |
| VO <sub>2</sub> -Ni-Br-ionic liquid                                                    | 65.9             | 55.3             | 70.1             | 43.1             | 27.0                 | 23        |
| VO <sub>2</sub> -Co <sup>II</sup> -Br-TMP                                              | 62.73            | 55.77            | 66.13            | 45.32            | 20.82                | 24        |
| VO <sub>2</sub> -Ni <sup>II</sup> -I-TMP                                               | 61.3             | 36.2             | 61.8             | 34.5             | 27.3                 | 25        |
| VO <sub>2</sub> -NLETS                                                                 | 65.16            | 52.54            | 69.09            | 44.75            | 24.34                | 26        |
| <b>Dual-Mode Driven VO<sub>2</sub>-based Smart Coatings</b>                            |                  |                  |                  |                  |                      |           |
| W-VO <sub>2</sub> +Liquid crystal                                                      | 55.35            | -                | -                | -                | 40.9                 | 27        |
| Gate-controlled VO <sub>2</sub>                                                        | -                | -                | -                | -                | 26.5                 | 28        |
| Elastomer + VO <sub>2</sub> nanoparticles                                              | 35.2             | 17.6             | -                | -                | 37.7                 | 29        |

1. X. Wu, Z. Wu, H. Zhang, R. Niu, Q. He, C. Ji, J. Wang and Y. Jiang, *Surf. Coat. Technol.*, 2015, **276**, 248-253.
2. J. Zhou, Y. Gao, X. Liu, Z. Chen, L. Dai, C. Cao, H. Luo, M. Kanahira, C. Sun and L. Yan, *Phys. Chem. Chem. Phys.*, 2013, **15**, 7505-7511.
3. L. Dai, S. Chen, J. Liu, Y. Gao, J. Zhou, Z. Chen, C. Cao, H. Luo and M. Kanahira, *Phys. Chem. Chem. Phys.*, 2013, **15**, 11723-11729.
4. B. Q. Zhu, H. Z. Tao and X. J. Zhao, *Infrared Physics & Technology*, 2016, **75**, 22-25.
5. G. Sun, X. Cao, H. Zhou, S. Bao and P. Jin, *Sol. Energy Mater. Sol. Cells*, 2017, **159**, 553-559.
6. J. Y. Zheng, S. H. Bao and P. Jin, *Nano Energy*, 2015, **11**, 136-145.
7. S. Dou, Y. Wang, X. Zhang, Y. Tian, X. Hou, J. Wang, X. Li, J. Zhao and Y. Li, *Solar Energy Materials and Solar Cells*, 2017, **160**, 164-173.
8. M. J. Powell, R. Quesada-Cabrera, A. Taylor, D. Teixeira, I. Papakonstantinou, R. G. Palgrave, G. Sankar and I. P. Parkin, *Chemistry of Materials*, 2016, **28**, 1369-1376.
9. N. R. Mlyuka, G. A. Niklasson and C. G. Granqvist, *Solar Energy Materials and Solar Cells*, 2009, **93**, 1685-1687.
10. G. Sun, H. Zhou, X. Cao, R. Li, M. Tazawa, M. Okada and P. Jin, *Acs Appl Mater Inter*, 2016, **8**, 7054-7059.
11. T. Chang, X. Cao, N. Li, S. Long, X. Gao, L. R. Dedon, G. Sun, H. Luo and P. Jin, *Acs Appl Mater Inter*, 2017, **9**, 26029-26037.
12. T. C. Chang, X. Cao, L. R. Dedon, S. W. Long, A. B. Huang, Z. W. Shao, N. Li, H. J. Luo and P. Jin, *Nano Energy*, 2018, **44**, 256-264.
13. Y. Zhan, X. Xiao, Y. Lu, Z. Cao, S. Qi, C. Huan, H. Cheng, J. Shi and G. Xu, *Solar Energy Materials and Solar Cells*, 2018, **174**, 102-111.
14. L. Kang, Y. Gao, H. Luo, Z. Chen, J. Du and Z. Zhang, *Acs Appl Mater Inter*, 2011, **3**, 135-138.
15. R. Li, S. Ji, Y. Li, Y. Gao, H. Luo and P. Jin, *Materials Letters*, 2013, **110**, 241-244.
16. Y. Gao, S. Wang, H. Luo, L. Dai, C. Cao, Y. Liu, Z. Chen and M. Kanahira, *Energy & Environmental Science*, 2012, **5**, 6104.
17. Y. Zhou, A. Huang, Y. Li, S. Ji, Y. Gao and P. Jin, *Nanoscale*, 2013, **5**, 9208-9213.
18. W. Li, S. Ji, K. Qian and P. Jin, *Ceram. Int.*, 2015, **41**, 5049-5056.
19. Y. Luo, M. Li, K. Li, C. Xu, S. Xu and G. Li, *Solar Energy Materials and Solar Cells*, 2019, **191**, 258-265.
20. C. Liu, X. Cao, A. Kamyshny, J. Y. Law, S. Magdassi and Y. Long, *J. Colloid Interface Sci.*, 2014, **427**, 49-53.
21. Y. Zhou, Y. Cai, X. Hu and Y. Long, *J. Mater. Chem. A*, 2015, **3**, 1121-1126.
22. J. Zhu, A. Huang, H. Ma, Y. Ma, K. Tong, S. Ji, S. Bao, X. Cao and P. Jin, *Acs Appl Mater Inter*, 2016, **8**, 29742-29748.

23. Y. Chen, J. Zhu, H. Ma, L. Chen, R. Li and P. Jin, *Solar Energy Materials and Solar Cells*, 2019, **196**, 124-130.
24. J. Zhu, A. Huang, H. Ma, S. Bao, S. Ji and P. Jin, *RSC Adv.*, 2016, **6**, 67396-67399.
25. F. Xu, X. Cao, J. Zhu, G. Sun, R. Li, S. Long, H. Luo and P. Jin, *Materials Letters*, 2018, **222**, 62-65.
26. J. Zhu, A. Huang, H. Ma, Y. Chen, S. Zhang, S. Ji, S. Bao and P. Jin, *New J. Chem.*, 2017, **41**, 830-835.
27. X. Liang, M. Chen, Q. Wang, S. Guo, L. Zhang and H. Yang, *Journal of Materials Chemistry C*, 2018, **6**, 7054-7062.
28. S. Chen, Z. Wang, H. Ren, Y. Chen, W. Yan, C. Wang, B. Li, J. Jiang and C. Zou, *Science Advances*, 2019, **5**, eaav6815.
29. Y. Ke, Y. Yin, Q. Zhang, Y. Tan, P. Hu, S. Wang, Y. Tang, Y. Zhou, X. Wen, S. Wu, T. J. White, J. Yin, J. Peng, Q. Xiong, D. Zhao and Y. Long, *Joule*, 2019, **3**, 858-871.
